1 **Structural basis for potent neutralization of SARS-CoV-2 and role of antibody affinity**

2 **maturation**

3

4 Nicholas K. Hurlburt<sup>1</sup>, Yu-Hsin Wan<sup>1</sup>, Andrew B. Stuart<sup>1</sup>, Junli Feng<sup>1</sup>, Andrew T. McGuire<sup>1,2</sup>, Leonidas

5 Stamatatos<sup>1,2</sup>, Marie Pancera<sup>1,3</sup>

6

7 <sup>1</sup>Fred Hutchinson Cancer Research Center, Vaccines and Infectious Diseases Division, Seattle, WA, USA

8 <sup>2</sup>University of Washington, Department of Global Health, Seattle, WA, USA

9 <sup>3</sup>Vaccine Research Center, National Institutes of Allergy and Infectious Diseases, National Institute of

10 Health, Bethesda, MD, USA

11 Correspondence: [mpancera@fredhutch.org](mailto:mpancera@fredhutch.org)

12

13 **Abstract**

14 SARS-CoV-2 is a betacoronavirus virus responsible for the COVID-19 pandemic. Here, we determined the

15 X-ray crystal structure of a potent neutralizing monoclonal antibody, CV30, isolated from a patient

16 infected with SARS-CoV-2, in complex with the receptor binding domain (RBD). The structure reveals

17 CV30's epitope overlaps with the human ACE2 receptor binding site thus providing the structural basis

18 for its neutralization by preventing ACE2 binding.

19

20

21 **Main**

22 COVID-19 was declared a pandemic in March 2020 by the World Health Organization<sup>1</sup>. As of June 11<sup>th</sup>,  
23 2020, there were ~ 7.4 M infections and over 415,000 deaths worldwide<sup>2</sup>. It is caused by a coronavirus  
24 of the beta family, named SARS-CoV-2<sup>3</sup>, as it is closely related to SARS-CoV<sup>4</sup>. Their genomes share 80%  
25 identity and they utilize angiotensin-converting enzyme 2 (ACE2) as receptor for entry<sup>5-11</sup>. Viral entry  
26 depends on the SARS-CoV-2 spike glycoprotein, a class I fusion protein comprised of two subunits, S1  
27 and S2. S1 mediates ACE2 binding through the receptor binding domain (RBD), while the S2 subunit  
28 mediates fusion. Overall the spike shares 76% amino acid sequence homology with SARS<sup>4</sup>. High  
29 resolution structures of the SARS-CoV-2 stabilized spike in the prefusion revealed that the RBD can be  
30 seen in a 'up' or 'down' conformation<sup>5,6</sup>. It's been shown that some of the neutralizing antibodies bind  
31 the RBD in the 'up' conformation similar to when the ACE2 receptor binds<sup>12</sup>. Currently there is no  
32 vaccine available to prevent SARS-CoV-2 infection and highly effective therapeutics have not been  
33 developed yet either. The host immune response to this new coronavirus is also not well understood.  
34 We, and others, sought to characterize the humoral immune response from infected COVID-19  
35 patients<sup>12-14</sup>. Recently, we isolated a neutralizing antibody, named CV30, which binds the receptor  
36 binding domain (RBD), neutralizes with 0.03 µg/ml and competes binding with ACE2<sup>15</sup>. However, the  
37 molecular mechanism by which CV30 blocked ACE2 binding was unknown. Herein, we present the 2.75  
38 Å crystal structure of SARS-CoV-2 RBD in complex with the Fab of CV30 (Extended Data Table 1).

39

40 CV30 binds almost exclusively to the concave ACE2 binding epitope (also known as the receptor binding  
41 motif (RBM)) of the RBD using all six CDR loops with a total buried surface area of ~1004 Å<sup>2</sup>, ~750 Å<sup>2</sup>  
42 from the heavy chain and ~254 Å<sup>2</sup> from the kappa chain (Fig. 1A). 20 residues from heavy chains and 10  
43 residues from the kappa chain interact with the RBD, forming 13 and 2 hydrogen bonds, respectively

44 (Fig. 1C and Extended Data Table 2). There are 29 residues from the RBD that interact with CV30, 19  
45 residues with the heavy chain, 7 residues with the light chain, and 3 residues with both (Extended Data  
46 Table 2). Of the 29 interacting residues from the SARS-CoV-2 RBD, only 16 are conserved in the SARS-  
47 CoV S protein RBD (Fig. 2c), which could explain the lack of cross-reactivity of CV30 to SARS-CoV S<sup>15</sup>. The  
48 CV30 heavy chain is minimally mutated with only a two-residue change from the germline and both of  
49 these residues (Val27-Ile28) are located in the CDRH1 and form nonpolar interactions with the RBD. We  
50 reverted these residues to germline to assess their role. Interestingly, the germline CV30 (gICV30)  
51 antibody bound to RBD with ~100-fold lower affinity (407 nM affinity) (Fig 1d and Extended Data Table  
52 3) compared to CV30 (3.6 nM<sup>15</sup>) with a very large difference in the off-rate. gICV30 neutralized SARS-  
53 CoV-2 with ~500-fold difference with an IC<sub>50</sub> of 16.5 vs 0.03 µg/mL for CV30 (Fig. 1e). Val27 forms a  
54 weak non-polar interaction with the RBD Asn487 and sits in a pocket formed by CDRH1 and 3. Although  
55 it is unclear, Phe27 presents in gICV30 could change the electrostatic environment. The Ile28 sidechain  
56 forms non-polar interactions with the RBD Gly476-Ser447, particularly the C $\gamma$  atom, which the gICV30  
57 Thr would be incapable of making. Thus, minimal affinity maturation of CV30 significantly impacted the  
58 ability of this mAb to neutralize SARS-CoV-2.

59

60 CV30 competes with ACE2 for binding to the RBD<sup>15</sup> and we therefore examined the structural  
61 mechanism of the receptor blocking by superimposing the SARS-CoV-2 RBD/ACE2 complex (PDB: 6LZG)<sup>9</sup>  
62 with the CV30 Fab/RBD complex. The structure of the RBD was used to align the two complexes and  
63 showed that CV30 binding did not induce any conformational changes in the RBD from the ACE2-bound  
64 complex. The aligned RBD had a RMSD of 0.353 Å over 166 C $\alpha$  atoms. The structure reveals that the  
65 CV30 epitope overlaps almost completely with the ACE2 epitope. A total of 26 residues of the SARS-CoV-  
66 2 RBD interact with hACE2, CV30 binds to 19 of these residues (Fig. 2A), indicating that CV30 neutralizes  
67 the virus by preventing the binding of ACE2 to RBD by direct steric interactions.

68

69 Recently, the structure of two potent neutralizing anti-RBD antibodies were published, B38 and CB6<sup>12,14</sup>.  
70 CV30 shares a similar germline heavy chain V-genes but all three have diverse germline kappa V-genes  
71 (CV30 is IGKV3-20\*01, B38 is IGKV1-9\*01, CB6 is IGKV1-39\*01, Extended Data Fig. 1). Both CV30 and  
72 B38 use IGHV3-53\*01 while CB6 uses IGHV3-66\*01, which is only one amino acid different than 3-53\*01  
73 (Val12 which does not make contact with the epitope). CV30 and CB6 each have higher affinities, 3.6 nM  
74 and 2.5 nM, respectively, than B38, 70.1 nM<sup>12,14,15</sup>. Differences in affinity translate into differences in  
75 neutralization potency (the IC50s for CV30 and CB6 are 0.03 and 0.036 µg/mL, respectively, and that of  
76 B38 is 0.177 µg/mL). Interestingly, Thr28 was also mutated from germline to Ile in B38 but Phe27 was  
77 not. CB6 lacks both mutations found in CV30. Differences in other regions of the antibody, such as the  
78 CDRH3 and light chain are likely responsible for the overall potency all these antibodies (see below). To  
79 investigate the binding mechanism of the three antibodies, a superposition of the structures was  
80 created. All three bind in a nearly identical manner with the same angle of approach and similar  
81 footprints (Fig. 2b). The alignment of the Fv regions of B38 and CB6 to the Fv region of CV30 had a RMSD  
82 of 0.240Å over 100 C<sub>α</sub> atoms and 0.329Å over 98 C<sub>α</sub> atoms, respectively. Mapping the binding  
83 interactions of the RBD to each of the antibodies reveals a close overlap in the binding mechanism (Fig.  
84 2c-d). The footprint of the heavy chain is nearly identical, as expected from the shared germline V-gene  
85 and sequence similarity. CV30 and CB6 both have longer CDRH3 and bind with higher buried surface  
86 area, ~263 and ~251 Å<sup>2</sup>, respectively, than B38 (~203 Å<sup>2</sup>) (Fig. 2d, Extended Data Fig. 1). The large  
87 difference is in the light chain. CV30 has the smallest binding interaction at ~254 Å<sup>2</sup>, B38 has the largest  
88 interaction at ~497 Å<sup>2</sup> and then CB6 at ~354 Å<sup>2</sup>. One of the more interesting findings was the interaction  
89 of Thr56 in the CV30 CDRK2 which reaches across the RBD and interacts Phe486, an interaction that is  
90 not found in the other two antibodies (Extended Data Fig. 1).

91

92 In conclusion, our structure indicates that potent neutralizing antibodies against SARS-CoV-2 bind the  
93 receptor binding motif in the RBD, overlapping the ACE2 binding site, but recognize residues that are  
94 specific for SARS-CoV-2 only, thus explaining the lack of cross neutralization with SARS-CoV. It is  
95 noteworthy that potently neutralizing antibodies isolated from multiple individuals use the same or  
96 similar VH gene to target their epitope. Additionally, the minimal affinity maturation observed 21 days  
97 after infection in the VH gene of CV30 showed ~100-500-fold increase in affinity and neutralization  
98 potency, indicating that further affinity maturation may increase potency and potential cross-reactivity.  
99 Our studies indicate that the RBD is a promising target for vaccine design and that these potently  
100 neutralizing antibodies should be explored as a treatment for COVID-19 infection.

101

102 **Figure legends**

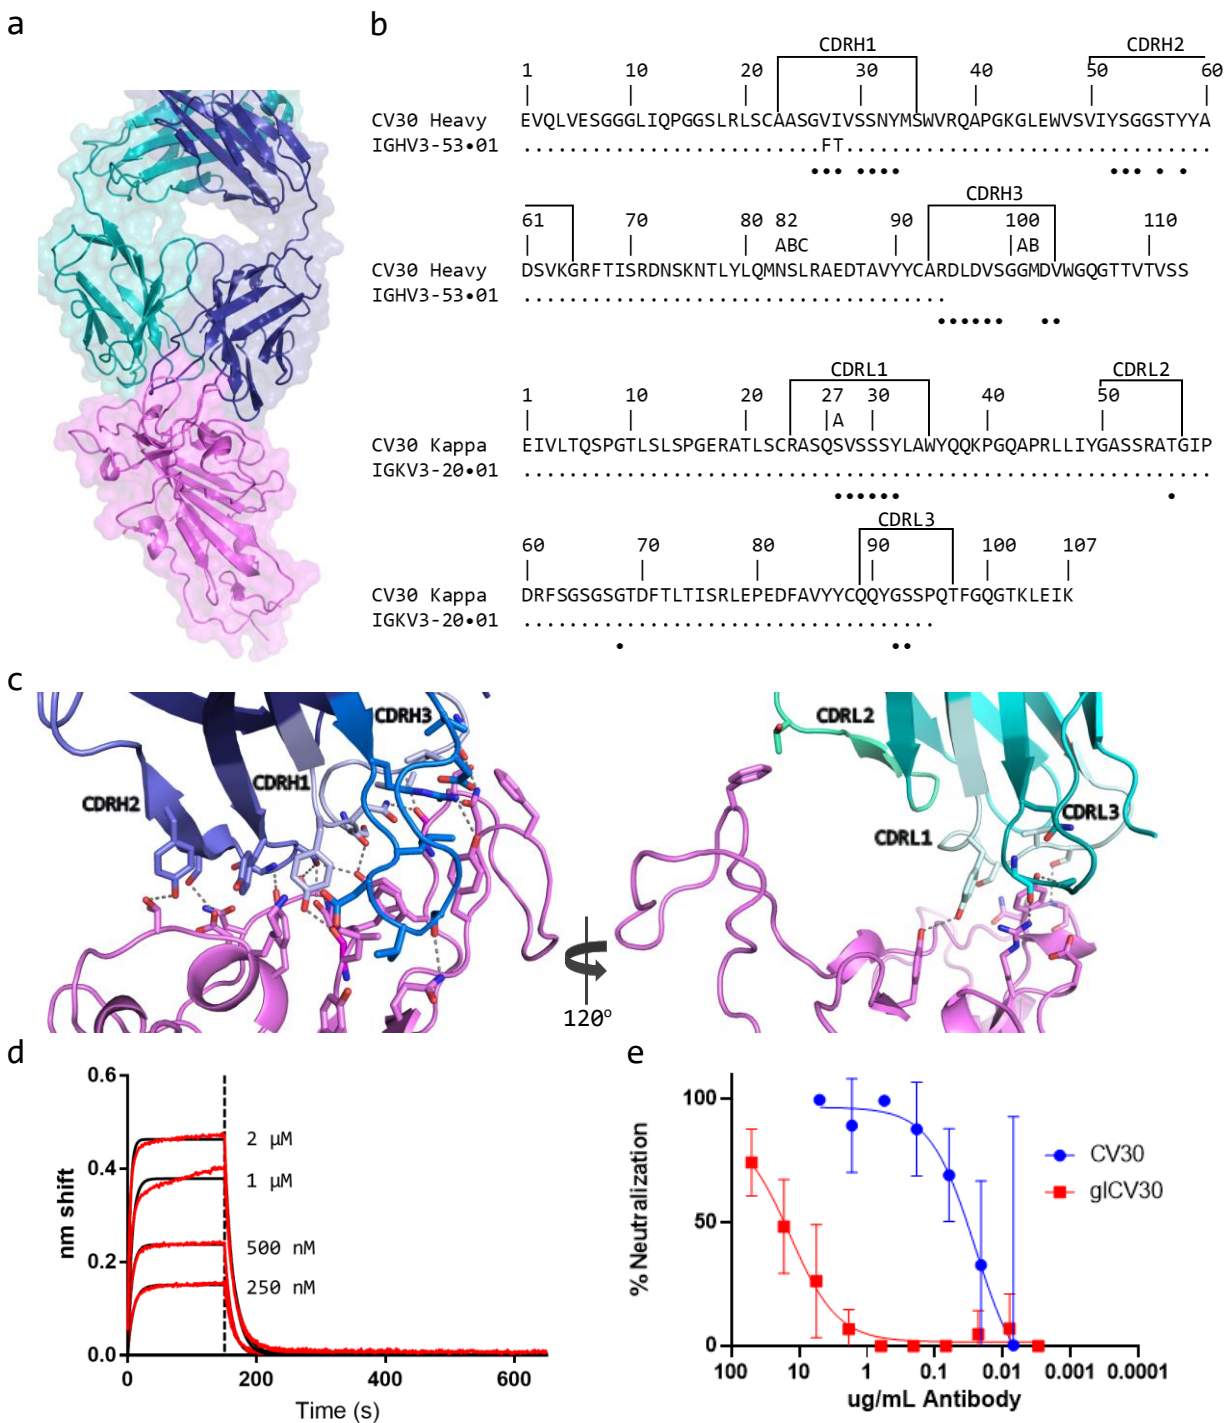

103

104 **Figure 1. Overall structure of CV30 Fab in complex with SARS-CoV-2 RBD and kinetics of glCV30. a.**

105 Structure is shown in cartoon with surface representation shown in transparency. CV30 heavy chain is

106 shown in dark blue and light chain in light blue. RBD is shown in pink. **b.** Sequence alignment of CV30  
107 heavy and light chains with germline genes. Black circles underneath the sequence indicate residues that  
108 interact with the RBD. **c.** Details of the interactions of the heavy (left) and light (right) chains with the  
109 RBD. CDRs are labeled and colored as shown. Residues that interacts are shown as sticks and Hydrogen  
110 bonds are shown in dotted lines. **d.** Kinetics of gICV30 binding to RBD measured by BLI. **e.** gICV30 and  
111 CV30 neutralization of SARS-CoV-2 pseudovirus.

112

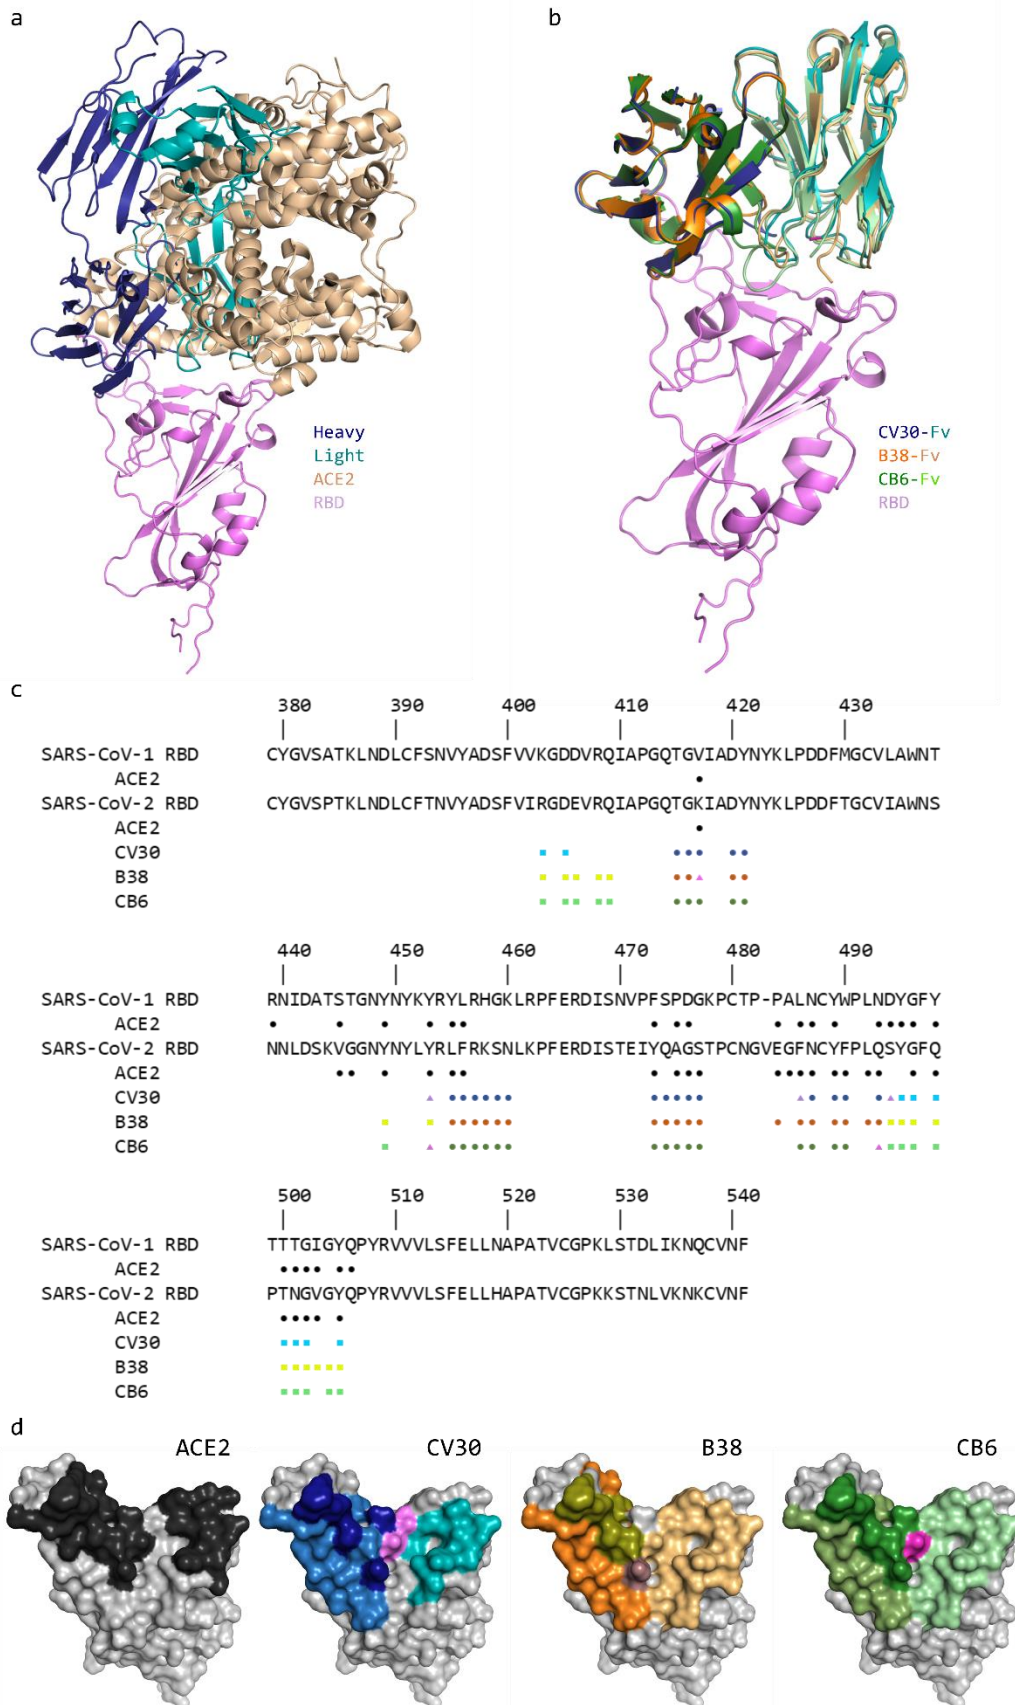



114 **Figure 2. Comparison of the CV30 epitope against ACE2 and other neutralizing antibodies. a.** Structural  
115 overlay of ACE2/RBD complex with CV30/RBD complex. **b.** Structural alignment of the variable domains  
116 of CV30, B38, and CB6. **c.** Sequence alignment of SARS-CoV RBD and SARS-CoV-2 RBD. The residues that  
117 interact with ACE2 are indicated by the black circles. Residues that interact with CV30, B38, and CB6 are  
118 indicated by the colored squares (light chain interactions), circles (heavy chain interactions), or triangles  
119 (interactions with both chains). **d.** Surface representation of the RBD with the binding epitope colored.  
120 Light chain interactions are the lightest color, heavy chain interactions are next lightest, and CDRH3  
121 specific interactions are darkest, and interacting with both heavy and light chain is purple.

122

## 123 **Methods**

### 124 **Recombinant Protein Expression and Purification**

125 The plasmid encoding the receptor binding domain of SARS-CoV-2 spike protein fused to a monomeric  
126 Fc ( $\alpha$ H-RBD-Fc) has been previously described<sup>5</sup> and was a gift from Dr. Jason McLellan.  
127 1L of 293SGlycoDelete cells<sup>16</sup> were cultured to a density of 1 million cells/mL and transiently transfected  
128 with 500 $\mu$ g of  $\alpha$ H-RBD-Fc using 2 mg of polyethylenimine (PEI, Polysciences, Cat# 24765). Cultural  
129 supernatant was harvested 6 days post-transfection by centrifugation and sterile filtered using a 0.22 $\mu$ m  
130 vacuum filter. The RBD was purified using protein A agarose resin (GoldBio, Cat# P-400) and cleaving the  
131 Fc domain using HRV3C protease (made in house) on-column. The eluate containing the RBD was further  
132 purified by SEC using a HiLoad 16/600 Superdex 200 pg column (GE Healthcare) column pre-equilibrated  
133 in 2mM Tris-HCl, pH 8.0, 200mM NaCl. Protein was aliquoted, flash frozen, and stored at -80°C until  
134 needed.

135

136 500mL of 293EBNA cells were cultured to a density of 1 million cells/mL and transiently transfected with  
137 125µg each of CV30 Heavy and Kappa chains using 1 mg of PEI. Cultural supernatant was harvested 6  
138 days post-transfection by centrifugation and sterile filtered using a 0.22µm vacuum filter. IgG was  
139 purified using protein A agarose resin and eluted using Pierce IgG Elution Buffer (Thermo Scientific, Cat#  
140 21004). Eluate was pH adjusted to 7.5 using 1M HEPES, pH 7.5. IgG was further purified by SEC using a  
141 HiLoad 16/600 Superdex 200 pg column. Antigen binding fragment (Fab) was generated by incubating  
142 IgG with LysC (New England Biolabs, Cat# P8109S) at a ratio of 1µg LysC per 10mg IgG at 37°C for 18hrs.  
143 Fab unexpectedly stuck to protein A resin and was eluted as mixture of Fab, undigested IgG, and  
144 digested Fc product using the IgG elution buffer. Fab and Fc product was purified by SEC. The CV30-Fab  
145 and SARS-CoV-2 RBD complex was obtained by mixing Fab and Fc product with a 2-fold molar excess of  
146 RBD and incubated for 90min at RT with nutation followed by SEC. The complex was verified by SDS-  
147 PAGE analysis.

148

#### 149 **Crystal Screening and Structure Determination**

150 The complex was concentrated to 10mg/mL for initial crystal screening by sitting-drop vapor-diffusion in  
151 the MCSG Suite (Anatrace) using a NT8 drop setter (Formulatrix). Diffracting crystals were obtained in a  
152 mother liquor (ML) containing 0.2M (NH<sub>4</sub>) Citrate, tribasic, pH 7.0 and 12% (w/v) PEG 3350. The crystals  
153 were cryoprotected by soaking in ML supplemented with 30% (v/v) ethylene glycol. Diffraction data was  
154 collected at Advanced Photon Source (APS) SBC 19-ID at a 12.662 keV. The data set was processed using  
155 XDS<sup>17</sup> to a resolution of 2.75Å. The structure of the complex was solved by molecular replacement using  
156 Phaser<sup>18</sup> with a search model of SARS-CoV-2 RBD (PDBid: 6lzg)<sup>9</sup> and the Fab structure (PDBid: 5i1e)<sup>19</sup>  
157 divided into Fv and Fc portions. Remaining model building was completed using COOT<sup>20</sup> and refinement

158 was performed in Phenix<sup>21</sup>. The data collection and refinement statistics are summarized in Extended  
159 Data Table 1. Structural figures were made in Pymol.

## 160 **BLI**

161 For kinetic analyses gICV30 was captured on anti-Human IgG Fc capture (AHC) sensors at a  
162 concentration of 20 µg/mL and loaded for 100s. After loading, the baseline signal was then recorded for  
163 1min in KB. The sensors were immersed into wells containing serial dilutions of purified SARS-CoV-2 RBD  
164 in KB for 150s (association phase), followed by immersion in KB for an additional 600s (dissociation  
165 phase). The background signal from each analyte-containing well was measured using VRC01 IgG control  
166 reference sensors and subtracted from the signal obtained with each corresponding gICV30 loaded  
167 sensor. Kinetic analyses were performed at least twice with an independently prepared analyte dilution  
168 series. Curve fitting was performed using a 1:1 binding model and the ForteBio data analysis software.  
169 Mean  $k_{on}$ ,  $k_{off}$  values were determined by averaging all binding curves that matched the theoretical fit  
170 with an R<sup>2</sup> value of  $\geq 0.98$ .

## 171 **Neutralization Assay**

172 HIV-1 derived viral particles were pseudotyped with full length wildtype SARS-CoV-2 S<sup>22</sup>. Briefly,  
173 plasmids expressing the HIV-1 Gag and pol (pHDM540 Hgpm2), HIV-1Rev (pRC-CMV-rev1b), HIV-1 Tat  
174 (pHDM-tat1b), the SARS-CoV-2 spike (pHDM-SARS-CoV-2 Spike ) and a luciferase/GFP reporter (pHAGE-  
175 CMV-Luc2-IRES542 ZsGreen-W ) were co-transfected into 293T cells at a 1:1:1:1.6:4.6 ratio using 293  
176 Free transfection reagent according to the manufacturer's instructions. 72 hours later the culture  
177 supernatant was harvested, clarified by centrifugation and frozen at -80°C.

178 293 cells stably expressing ACE2 (HEK-293T-hACE2) were seeded at a density of  $4 \times 10^3$  cells/well in a 100  
179 µL volume in 96 well flat bottom tissue culture plates. The next day, CV30 and germline CV30 were  
180 serially diluted in 30 µL of cDMEM in 96 well round bottom 27 plates in triplicate. An equal volume of

181 viral supernatant diluted to result in  $2 \times 10^5$  luciferase units was added to each well and incubated for 60  
182 min at 37 °C. Meanwhile 50  $\mu$ L of cDMEM containing 6  $\mu$ g/mL polybrene was added to each well of  
183 293T-ACE2 cells (2  $\mu$ g/mL final concentration) and incubated for 30 min. The media was aspirated from  
184 293T-ACE2 cells and 100  $\mu$ L of the virus-antibody mixture was added. The plates were incubated at 37°C  
185 for 72 hours. The supernatant was aspirated and replaced with 100  $\mu$ L of Steadyglo luciferase reagent  
186 (Promega). 75  $\mu$ L was then transferred to an opaque, white bottom plate and read on a Fluorskan  
187 Ascent Fluorimeter. Control wells containing virus but no antibody (cells + virus) and no virus or  
188 antibody (cells only) were included on each plate.

189 % neutralization for each well was calculated as the RLU of the average of the cells + virus wells, minus  
190 test wells (cells + mAb + virus), and dividing this result difference by the average RLU between virus  
191 control (cells+ virus) and average RLU between wells containing cells alone, multiplied by 100. The  
192 antibody concentration that neutralized 50% of infectivity (IC50) was interpolated from the  
193 neutralization curves determined using the log(inhibitor) vs. response -- Variable slope (four  
194 parameters) fit using automatic outlier detection in Graphpad Prism Software.

195

## 196 **Data availability**

197 Coordinates and structure factors for CV30 Fab-SARS-CoV-2 RBD complex have been deposited in the  
198 Protein Data Bank (PDB) under the accession code 6XE1.

199

## 200 **References**

- 201 1. Mahase, E. Covid-19: WHO declares pandemic because of "alarming levels" of spread, severity,  
202 and inaction. *BMJ* **368**, m1036 (2020).
- 203 2. Dong, E., Du, H. & Gardner, L. An interactive web-based dashboard to track COVID-19 in real  
204 time. *Lancet Infect Dis* (2020).

- 205 3. Wu, Y. et al. SARS-CoV-2 is an appropriate name for the new coronavirus. *Lancet* (2020).  
206 4. Wan, Y., Shang, J., Graham, R., Baric, R.S. & Li, F. Receptor Recognition by the Novel Coronavirus  
207 from Wuhan: an Analysis Based on Decade-Long Structural Studies of SARS Coronavirus. *J Virol*  
208 **94**(2020).  
209 5. Wrapp, D. et al. Cryo-EM structure of the 2019-nCoV spike in the prefusion conformation.  
210 *Science* **367**, 1260-1263 (2020).  
211 6. Walls, A.C. et al. Structure, Function, and Antigenicity of the SARS-CoV-2 Spike Glycoprotein. *Cell*  
212 (2020).  
213 7. Hoffmann, M. et al. SARS-CoV-2 Cell Entry Depends on ACE2 and TMPRSS2 and Is Blocked by a  
214 Clinically Proven Protease Inhibitor. *Cell* (2020).  
215 8. Yan, R. et al. Structural basis for the recognition of SARS-CoV-2 by full-length human ACE2.  
216 *Science* **367**, 1444-1448 (2020).  
217 9. Wang, Q. et al. Structural and Functional Basis of SARS-CoV-2 Entry by Using Human ACE2. *Cell*  
218 (2020).  
219 10. Letko, M., Marzi, A. & Munster, V. Functional assessment of cell entry and receptor usage for  
220 SARS-CoV-2 and other lineage B betacoronaviruses. *Nat Microbiol* **5**, 562-569 (2020).  
221 11. Ou, X. et al. Characterization of spike glycoprotein of SARS-CoV-2 on virus entry and its immune  
222 cross-reactivity with SARS-CoV. *Nat Commun* **11**, 1620 (2020).  
223 12. Shi, R. et al. A human neutralizing antibody targets the receptor binding site of SARS-CoV-2.  
224 *Nature* (2020).  
225 13. Ju, B. et al. Human neutralizing antibodies elicited by SARS-CoV-2 infection. *Nature* (2020).  
226 14. Wu, Y. et al. A noncompeting pair of human neutralizing antibodies block COVID-19 virus binding  
227 to its receptor ACE2. *Science* (2020).  
228 15. Seydoux, E. et al. Analysis of a SARS-CoV-2 infected individual reveals development of potent  
229 neutralizing antibodies to distinct epitopes with limited somatic mutation. *Immunity* (2020).  
230 16. Meuris, L. et al. GlycoDelete engineering of mammalian cells simplifies N-glycosylation of  
231 recombinant proteins. *Nat Biotechnol* **32**, 485-9 (2014).  
232 17. Kabsch, W. Xds. *Acta Crystallogr D Biol Crystallogr* **66**, 125-32 (2010).  
233 18. McCoy, A.J. et al. Phaser crystallographic software. *J Appl Crystallogr* **40**, 658-674 (2007).  
234 19. Teplyakov, A. et al. Structural diversity in a human antibody germline library. *MAbs* **8**, 1045-63  
235 (2016).  
236 20. Emsley, P. & Cowtan, K. Coot: model-building tools for molecular graphics. *Acta Crystallogr D*  
237 *Biol Crystallogr* **60**, 2126-32 (2004).  
238 21. Adams, P.D. et al. Recent developments in the PHENIX software for automated crystallographic  
239 structure determination. *J Synchrotron Radiat* **11**, 53-5 (2004).  
240 22. Crawford, K.H.D. et al. Protocol and Reagents for Pseudotyping Lentiviral Particles with SARS-  
241 CoV-2 Spike Protein for Neutralization Assays. *Viruses* **12**(2020).

242

243

244

245

246 **Acknowledgments**

247 This work was supported by generous donations to Fred Hutch COVID-19 Research Fund. We thank Dr.  
248 McLellan for providing the SARS-CoV-2 RBD plasmid. We thank the J. B. Pendleton Charitable Trust for  
249 its generous support of Formulatrix robotic instruments. Results shown in this report are derived from  
250 work performed at Argonne National Laboratory, Structural Biology Center (SBC), ID-19, at the Advanced  
251 Photon Source. SBC-CAT is operated by UChicago Argonne, LLC, for the U.S. Department of Energy,  
252 Office of Biological and Environmental Research under contract DE-AC02-06CH11357.

253

254 **Author contribution**

255 N.K.H, A.T.M., L.S and M.P. conceived the project. N.K.H, A.T.M., L.S and M.P designed the experiments.  
256 J.F. cloned the plasmids. N.K.H and A.B.S. expressed and purified the proteins. N.K.H. crystallized  
257 proteins, collected and processed the diffraction data, and solved the crystal structure. N.K.H and A.J.M.  
258 performed kinetic experiments. Y-H. W. and A.J.M performed neutralization assay. N.K.H, A.T.M., L.S  
259 and M.P. analyzed and discussed data. N.K.H and M.P. wrote the original manuscript draft. N.K.H,  
260 A.T.M., L.S and M.P. reviewed and edited the manuscript.

261
